# Supplementary material
Source: Elsevier journal article supplement (https://rcastoragev2.blob.core.windows.net/25861203d4d8f5914f02a1d104f91c31/mmc1.pdf)
Supplement: mmc1 [file mmc1.pdf]

# THE LANCET

## Healthy Longevity

### **Supplementary appendix**

This appendix formed part of the original submission and has been peer reviewed.  
We post it as supplied by the authors.

Supplement to: Tai XY, Veldsman M, Lyall DM, et al. Cardiometabolic multimorbidity, genetic risk, and dementia: a prospective cohort study. *Lancet Healthy Longev* 2022; **3**: e428–36.

## **Supplementary material**

**Table S1. Codes used in the UK Biobank study to identify dementia and cardiometabolic condition cases and exclusion diagnoses**

**Figure S1. Study flow chart**

**Figure S2. Distribution of polygenic risk score for Alzheimer's Disease**

**Table S2. Association between cardiometabolic multimorbidity index and polygenic risk score**

**Figure S3. Risk of incident dementia based on cardiometabolic multimorbidity index and polygenic risk group.**

**Figure S4. Risk of incident dementia stratified by individual cardiovascular and metabolic conditions**

**Figure S5. Risk of incident dementia by cardiometabolic condition groups with myocardial infarction, atrial fibrillation and heart failure represented by a single heart disease variable**

**Table S3. Dementia risk by cardiometabolic index and polygenic risk quintiles**

**Table S4. Risk of incident dementia according to cardiometabolic multimorbidity and genetic risk, controlling for APOE  $\epsilon$ 4 status**

**Figure S6. Risk of incident dementia by according to cardiometabolic multimorbidity index and genetic risk (additionally controlled for upstream risk factors)**

**Table S5. Dementia risk by cardiometabolic condition status with different follow-up periods**

**Figure S7. Risk of incident dementia by cardiometabolic disease status at baseline (unadjusted model)**

**Figure S8. Risk of incident dementia by according to cardiometabolic multimorbidity index and genetic risk (unadjusted model)**

**Table S6. Post-hoc comparisons examining the differences between individual indices of cardiometabolic multimorbidity and polygenic risk groups**

**Table S7. Associations between total hippocampal, total grey matter, total white matter hyperintensity volume with cardiometabolic multimorbidity index, polygenic risk and other baseline characteristics.**

**Table S1. Codes used in the UK Biobank study to identify dementia and cardiometabolic condition cases and exclusion diagnoses**

|                                                | Algorithmically-derived                | Self-report (includes non-cancer and treatment self report) | Illness code: ICD-10                                                                                                                                                                                                                                                                                                                                                                                | Illness code: ICD-9                                                                                          |
|------------------------------------------------|----------------------------------------|-------------------------------------------------------------|-----------------------------------------------------------------------------------------------------------------------------------------------------------------------------------------------------------------------------------------------------------------------------------------------------------------------------------------------------------------------------------------------------|--------------------------------------------------------------------------------------------------------------|
| <b>Dementia</b>                                | -                                      | 1263                                                        | AD: F00, F00.0, F00.1, F00.2, F00.9, G30, G30.0, G30.1, G30.8, G30.9<br>VaD: F01, F01.0, F01.1, F01.2, F01.3, F01.8, F01.9, I67.3 FTD: F02.0, G31.0, Other codes for all-cause dementia: A81.0, F02, F02.1, F02.2, F02.3, F02.4, F02.8, F03, F05.1, F10.6, G31.1, G31.8                                                                                                                             | AD: 331.0 VaD: 290.4 FTD: 331.1 Other codes for all-cause dementia: 290.2, 290.3, 291.2, 294.1, 331.2, 331.5 |
| <b>Myocardial Infarction</b>                   | All-cause myocardial infarction: 42000 | -                                                           | -                                                                                                                                                                                                                                                                                                                                                                                                   | -                                                                                                            |
| <b>Stroke</b>                                  | All-cause stroke: 42006                | -                                                           | -                                                                                                                                                                                                                                                                                                                                                                                                   | -                                                                                                            |
| <b>Diabetes</b>                                | -                                      | 2443, 6153, 6177,                                           | E10, E100, E101, E102, E103, E104, E105, E106, E107, E108, E109 E11, E110, E111, E112, E113, E114, E115, E116, E117, E118, E119, E12, E120, E121, E122, E123, E124, E125, E126, E127, E128, E129, E13, E130, E131, E132, E133, E134, E135, E136, E137, E138, E139, E14, E140, E141, E142, E143, E144, E145, E146, E147, E148, E149, E15, E150, E151, E152, E153, E154, E155, E156, E157, E158, E159 | '25000', '25001', '25009', '25010', '25011', '25019', '25029', '2503', '2504', '2505', '25099'               |
| <b>Atrial Fibrillation</b>                     | -                                      | 1471, 1483                                                  | I48                                                                                                                                                                                                                                                                                                                                                                                                 | 4273                                                                                                         |
| <b>Heart Failure</b>                           | -                                      | -                                                           | I110, I130, I132, I255, I420, I425, I428, I429, I500, I501, I509                                                                                                                                                                                                                                                                                                                                    | 4254, 4280, 4281, 4289                                                                                       |
| <b>Peripheral vascular disease</b>             |                                        | 1067, 1087                                                  |                                                                                                                                                                                                                                                                                                                                                                                                     |                                                                                                              |
| <b>Infection of the central nervous system</b> | -                                      | 1244                                                        | -                                                                                                                                                                                                                                                                                                                                                                                                   | -                                                                                                            |
| <b>Encephalitis</b>                            | -                                      | 1246                                                        | -                                                                                                                                                                                                                                                                                                                                                                                                   | -                                                                                                            |
| <b>Meningitis</b>                              | -                                      | 1247                                                        | -                                                                                                                                                                                                                                                                                                                                                                                                   | -                                                                                                            |
| <b>Amyotrophic lateral sclerosis</b>           | -                                      | 1259                                                        | -                                                                                                                                                                                                                                                                                                                                                                                                   | -                                                                                                            |

|                                     |   |      |   |   |
|-------------------------------------|---|------|---|---|
| <b>Multiple Sclerosis</b>           | - | 1261 | - | - |
| <b>Head Injury</b>                  | - | 1266 | - | - |
| <b>Subdural<br/>Haematoma</b>       | - | 1083 | - | - |
| <b>Subarachnoid<br/>Haemorrhage</b> | - | 1086 | - | - |

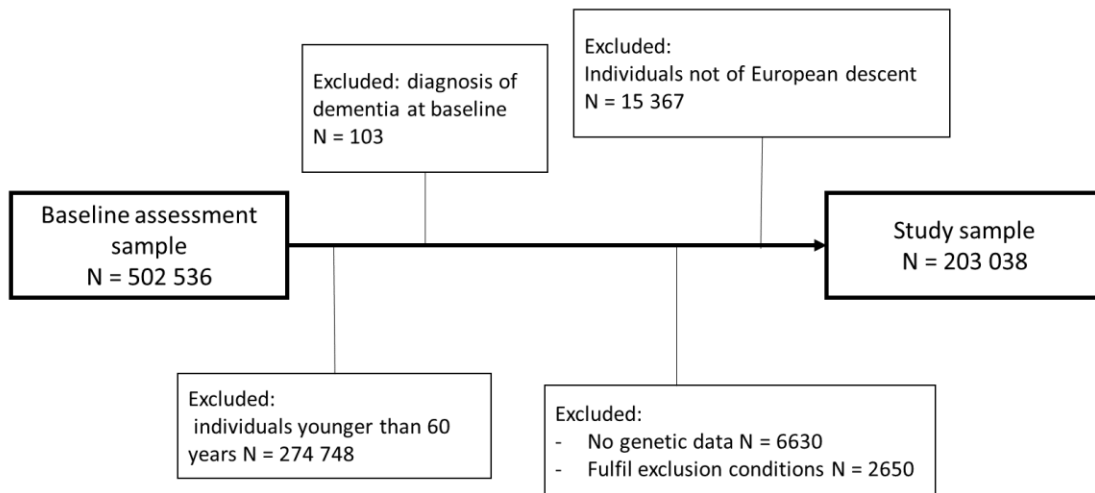

**Figure S1. Study flow chart**

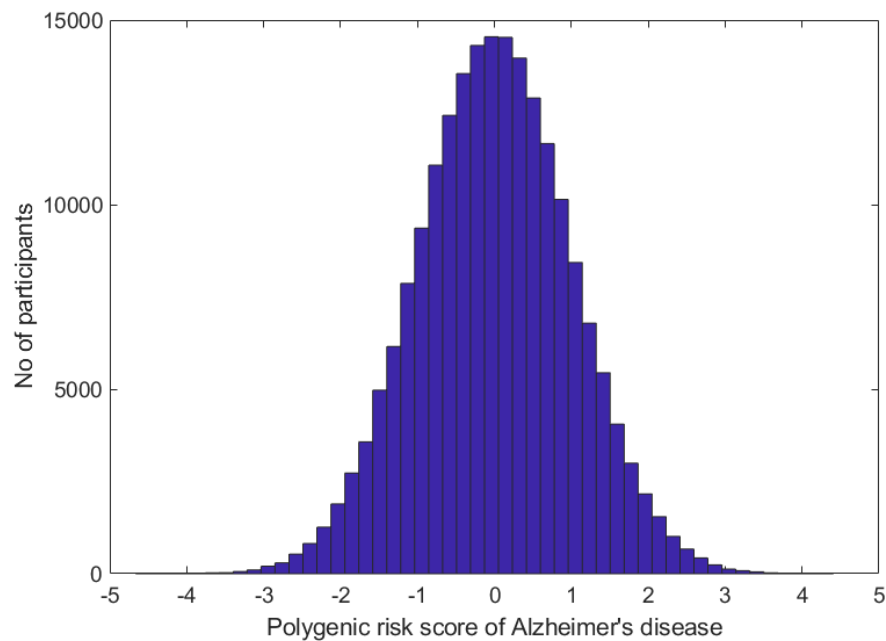

**Figure S2. Distribution of polygenic risk score for Alzheimer's Disease.**

**Table S2. Association between cardiometabolic multimorbidity index and polygenic risk score**

|                   | Polygenic risk score |       |
|-------------------|----------------------|-------|
|                   | $\beta$              | p     |
| <b>CM index 1</b> | -5.1481e-07          | 0.103 |
| <b>CM index 2</b> | 7.0729e-07           | 0.459 |
| <b>CM index 3</b> | -6.9069e-06          | 0.103 |

*Note:  $\beta$  =unstandardised betas. Adjusted for age, sex, education, socioeconomic status, relatedness, number of alleles included in the polygenic risk score, first 20 principal components of ancestry and assessment centre.*

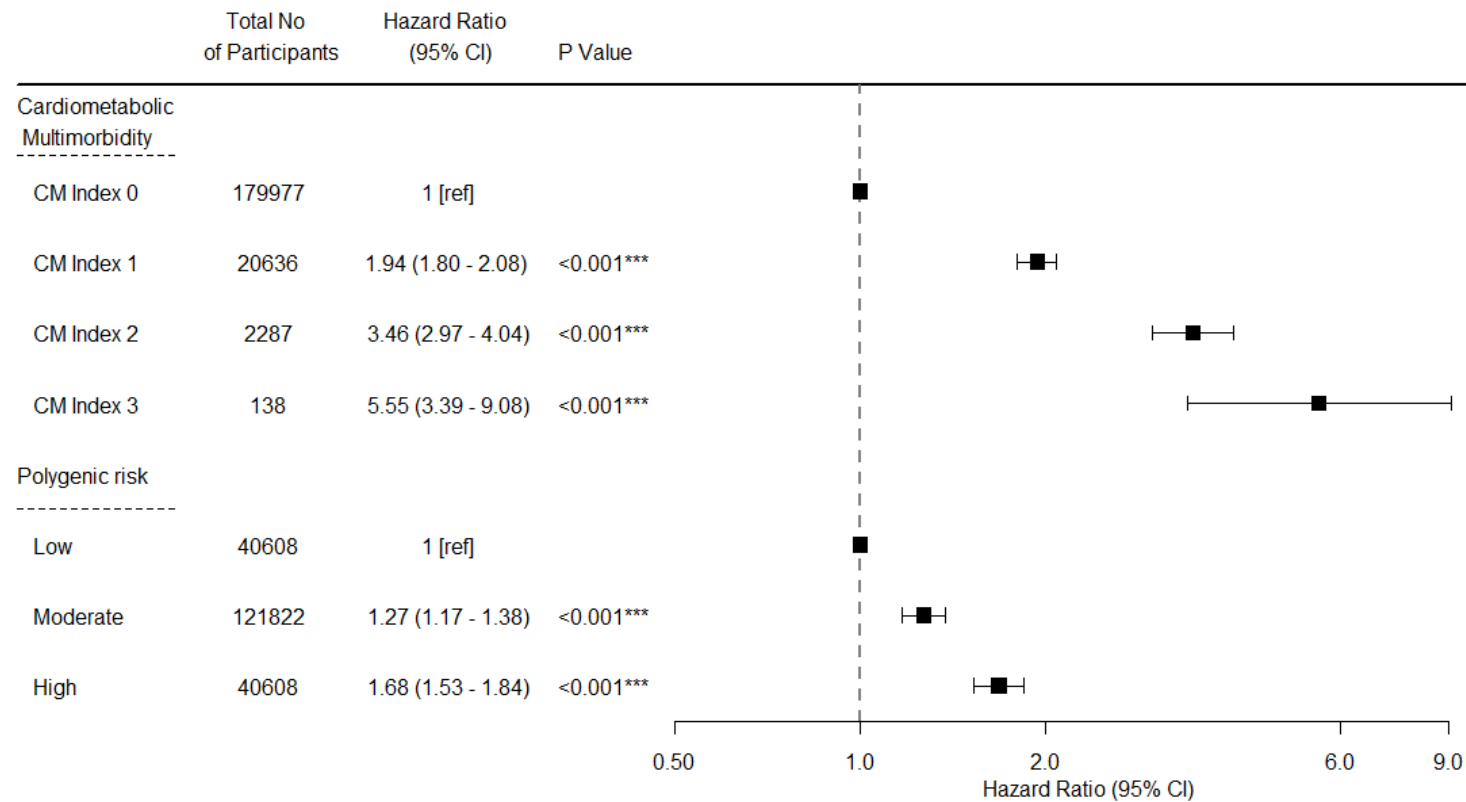

**Figure S3. Risk of incident dementia based on cardiometabolic multimorbidity index and polygenic risk group.**

*Note: Adjusted for age, sex, education, socioeconomic status, relatedness, number of alleles included in the polygenic risk score, first 20 principal components of ancestry and assessment centre. Abbreviation: CM, cardiometabolic multimorbidity*

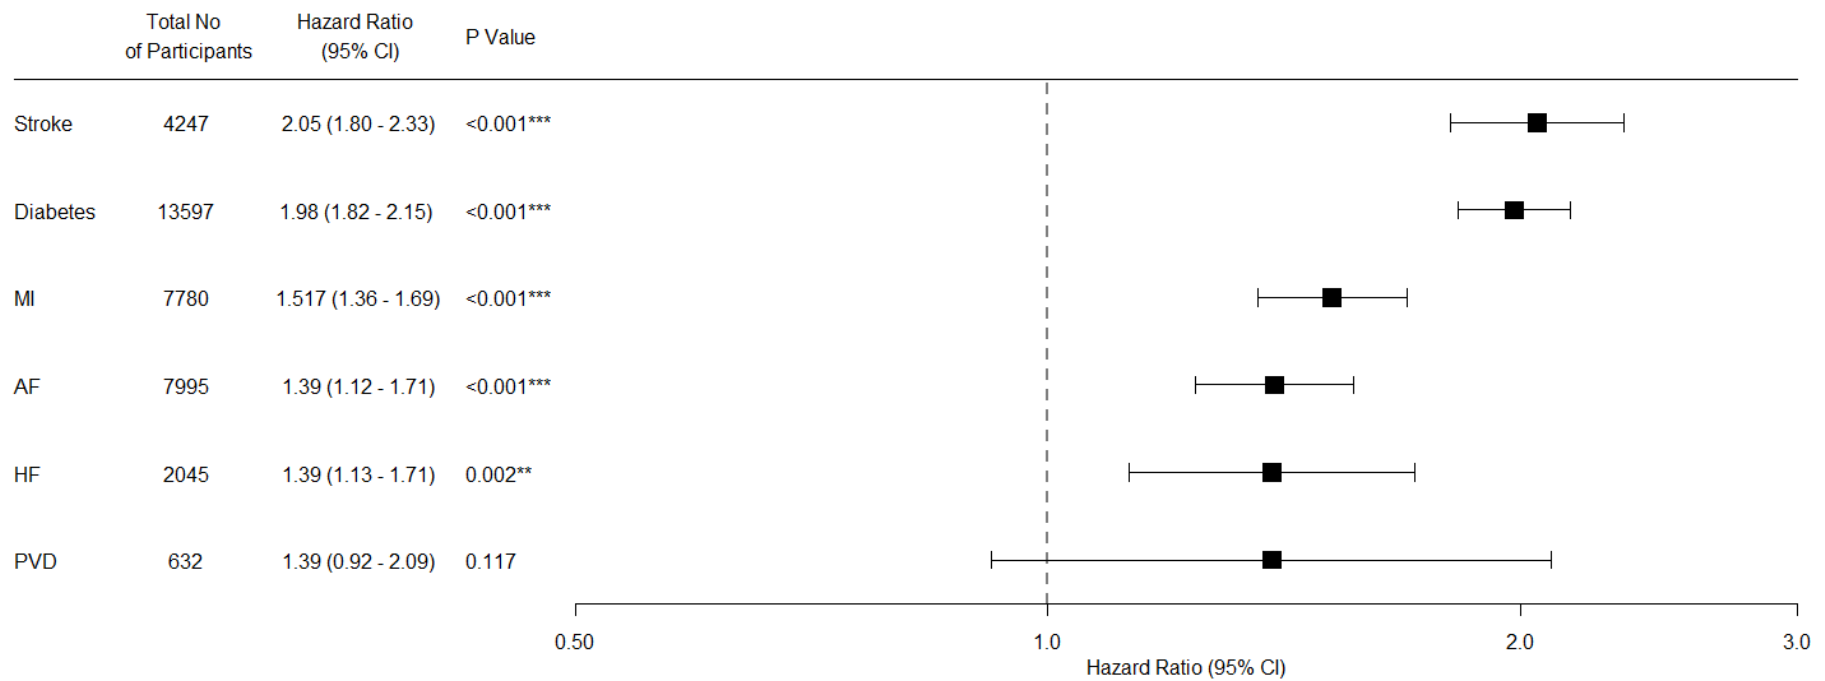

**Figure S4. Risk of incident dementia stratified by individual cardiovascular and metabolic conditions**

*Note: Adjusted for age, sex, education, socioeconomic status, relatedness, number of alleles included in the polygenic risk score, first 20 principal*

*components of ancestry and assessment centre. Abbreviation: MI, myocardial infarction; AF, atrial fibrillation; HF, heart failure; PVD, peripheral vascular disease.*



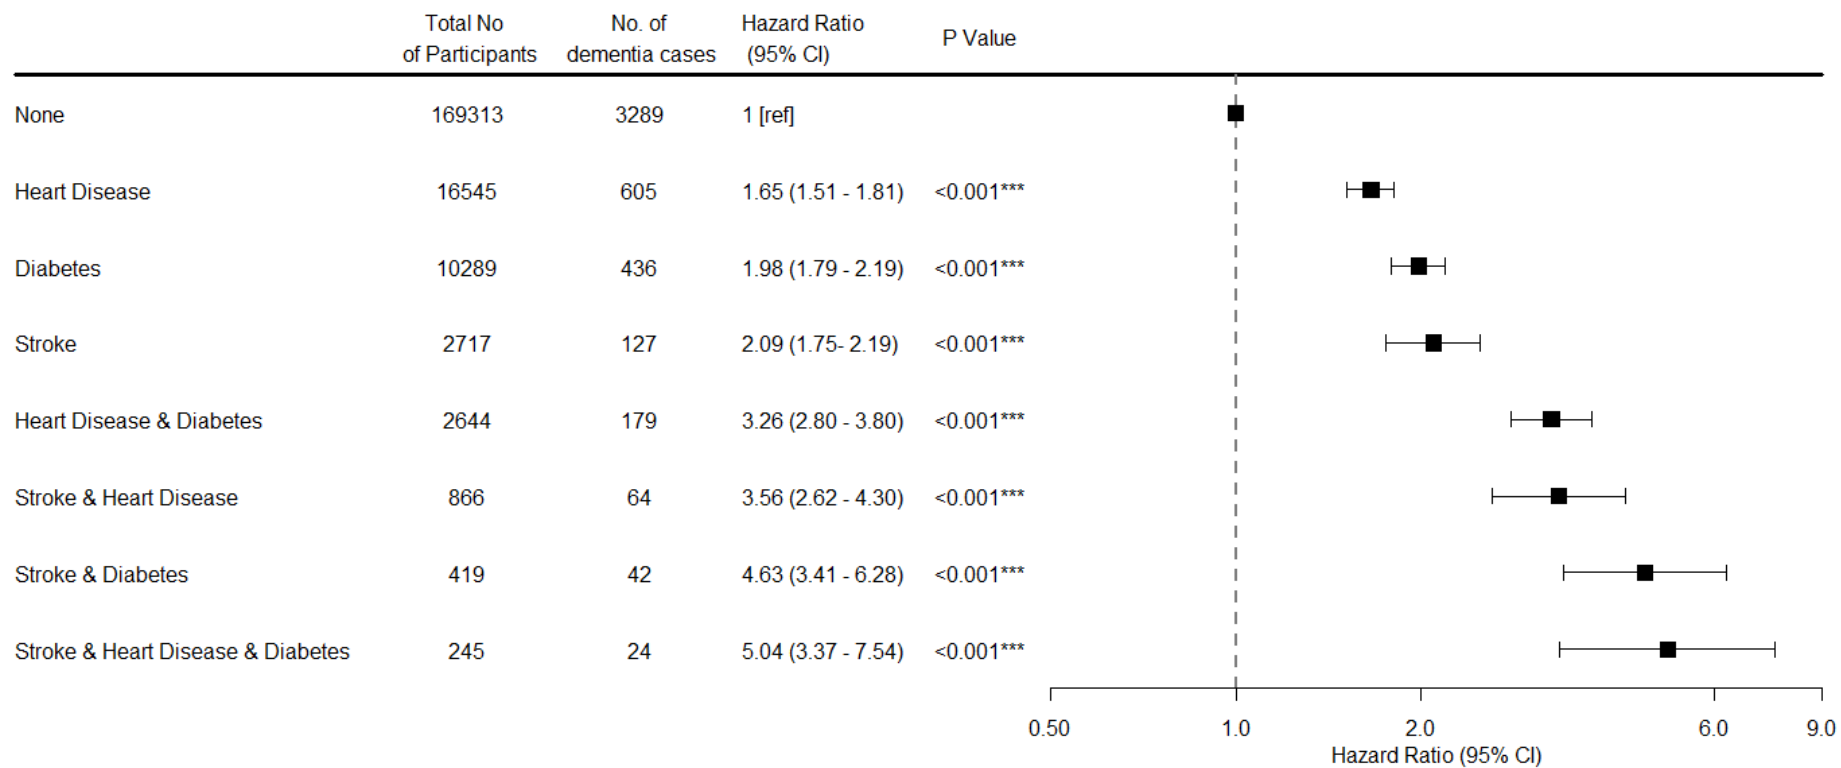

**Figure S5. Risk of incident dementia by cardiometabolic condition groups with myocardial infarction, atrial fibrillation and heart failure represented by a single ‘heart disease’ variable**

*Note: Adjusted for age, sex, education, socioeconomic status, relatedness, number of alleles included in the polygenic risk score, first 20 principal components of ancestry and assessment centre.*

**Table S3. Dementia risk by cardiometabolic index and polygenic risk quintiles**

|             | Dementia risk         |           |
|-------------|-----------------------|-----------|
|             | Hazard Ratio (95% CI) | P-value   |
| CM Index 0  | 1.00                  | [Ref]     |
| CM Index 1  | 1.94 (1.80 - 2.08)    | ***<0.001 |
| CM Index 2  | 3.45 (2.96 - 4.03)    | ***<0.001 |
| CM Index 3  | 1.94 (1.73 - 2.18)    | ***<0.001 |
| PRS quint 1 | 1.00                  | [Ref]     |
| PRS quint 2 | 1.20 (1.09 - 1.33)    | ***<0.001 |
| PRS quint 3 | 1.22 (1.10 - 1.34)    | ***<0.001 |
| PRS quint 4 | 1.38 (1.25 - 1.52)    | ***<0.001 |
| PRS quint 5 | 1.68 (1.53 - 1.84)    | ***<0.001 |

*Note: Adjusted for age, sex, education, socioeconomic status, relatedness, number of alleles included in the polygenic risk score, first 20 principal*

*components of ancestry and assessment centre. Abbreviations: CM, cardiometabolic multimorbidity; PRS, polygenic risk score; CI, confidence interval*

**Table S4. Risk of incident dementia according to cardiometabolic multimorbidity and genetic risk, controlling for APOE ɛ4 status**

|                              | Dementia risk         |           |
|------------------------------|-----------------------|-----------|
|                              | Hazard Ratio (95% CI) | P-value   |
| <u>Low genetic risk</u>      |                       |           |
| CM Index 0                   | 1.00                  | [Ref]     |
| CM Index 1                   | 1.98 (1.65 - 2.38)    | ***<0.001 |
| CM Index 2+                  | 3.55 (2.43 - 5.20)    | *0.004    |
| <u>Moderate genetic risk</u> |                       |           |
| CM Index 0                   | 1.15 (1.04 - 1.26)    | ***<0.001 |
| CM Index 1                   | 2.33 (2.07 - 2.62)    | ***<0.001 |
| CM Index 2+                  | 4.16 (3.40 - 5.10)    | ***<0.001 |
| <u>Moderate genetic risk</u> |                       |           |
| CM Index 0                   | 1.42 (1.28 - 1.57)    | ***<0.001 |
| CM Index 1                   | 2.35 (2.00 - 2.76)    | ***<0.001 |
| CM Index 2+                  | 4.90 (3.63 - 6.61)    | ***<0.001 |

*Note: Adjusted for age, sex, education, socioeconomic status, relatedness, number of alleles included in the polygenic risk score, first 20 principal*

*components of ancestry and assessment centre. Abbreviations: CM, cardiometabolic multimorbidity; PRS, polygenic risk score; CI, confidence interval*

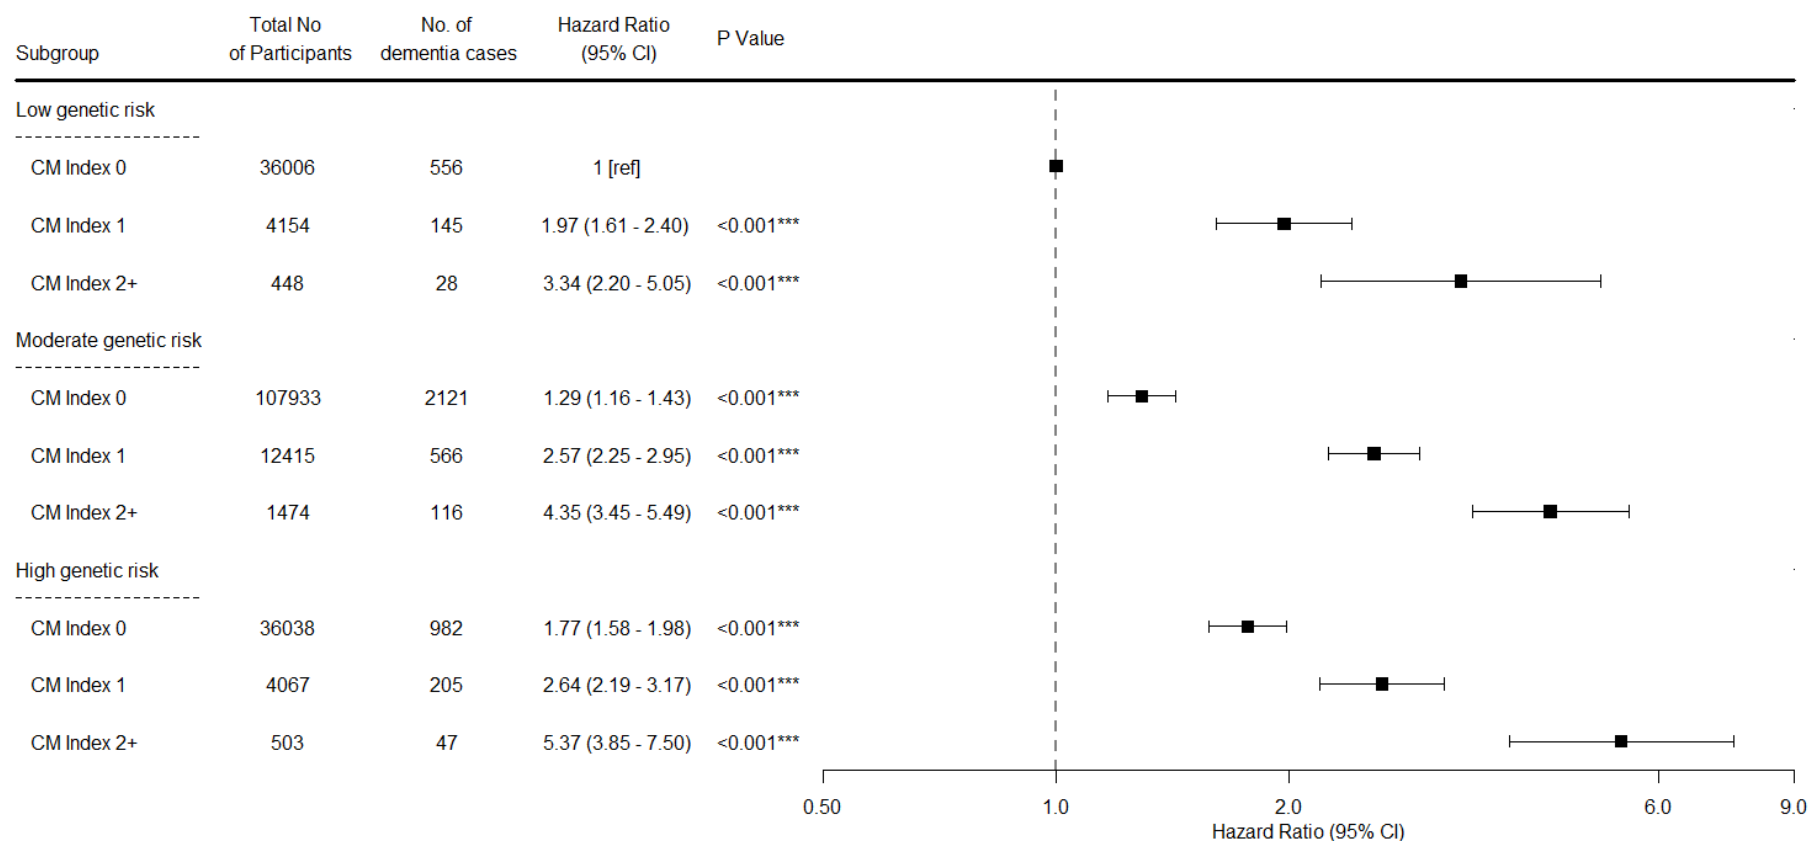

**Figure S6. Risk of incident dementia by according to cardiometabolic multimorbidity index and genetic risk (additionally controlled for upstream risk factors)**

Shown are the hazard ratios for incident dementia, according to cardiometabolic multimorbidity index and genetic risk with further adjustment for markers of upstream cardiovascular and metabolic risk factors (systolic blood pressure, total cholesterol, body mass index and glycosylated haemoglobin levels) in addition to for age, sex, education, socioeconomic status, relatedness, number of alleles included in the polygenic risk score, first 20 principal components of ancestry and assessment centre. *Abbreviations: CM, cardiometabolic multimorbidity*

**Table S5. Dementia risk by cardiometabolic condition status with different follow-up periods**

| Subgroup                                        | Dementia risk at 10 years |                       |           | Dementia risk between 10 - 14 years |                       |           |
|-------------------------------------------------|---------------------------|-----------------------|-----------|-------------------------------------|-----------------------|-----------|
|                                                 | No. of dementia cases     | Hazard Ratio (95% CI) | P-value   | No. of dementia cases               | Hazard Ratio (95% CI) | P-value   |
| <i>No cardiometabolic conditions (baseline)</i> | 2308                      | 1.00                  | [Ref]     | 1352                                | 1.00                  | [Ref]     |
| Stroke                                          | 112                       | 2.45 (2.05 - 2.94)    | ***<0.001 | 45                                  | 1.87 (1.41 - 2.48)    | ***<0.001 |
| MI                                              | 164                       | 1.79 (1.53 - 2.09)    | ***<0.001 | 71                                  | 1.56 (1.23 - 1.97)    | ***<0.001 |
| Diabetes                                        | 329                       | 1.94 (1.73 - 2.18)    | ***<0.001 | 195                                 | 2.29 (1.97 - 2.65)    | ***<0.001 |
| Stroke & MI                                     | 36                        | 3.41 (2.28 - 5.10)    | ***<0.001 | 14                                  | 4.37 (2.53 - 7.55)    | ***<0.001 |
| Stroke & Diabetes                               | 51                        | 4.70 (3.39 - 6.50)    | ***<0.001 | 15                                  | 4.09 (2.46 - 6.81)    | ***<0.001 |
| MI & Diabetes                                   | 74                        | 3.02 (2.34 - 3.90)    | ***<0.001 | 33                                  | 3.69 (2.60 - 5.24)    | ***<0.001 |
| Stroke & MI & Diabetes                          | 15                        | 7.34 (4.41 - 12.21)   | ***<0.001 | 1                                   | 1.28 (0.18 - 9.12)    | 0.80      |

*Note: Adjusted for age, sex, education, socioeconomic status, relatedness, number of alleles included in the polygenic risk score, first 20 principal*

*components of ancestry and assessment centre. Abbreviations: MI, myocardial infarction; CI, confidence interval*

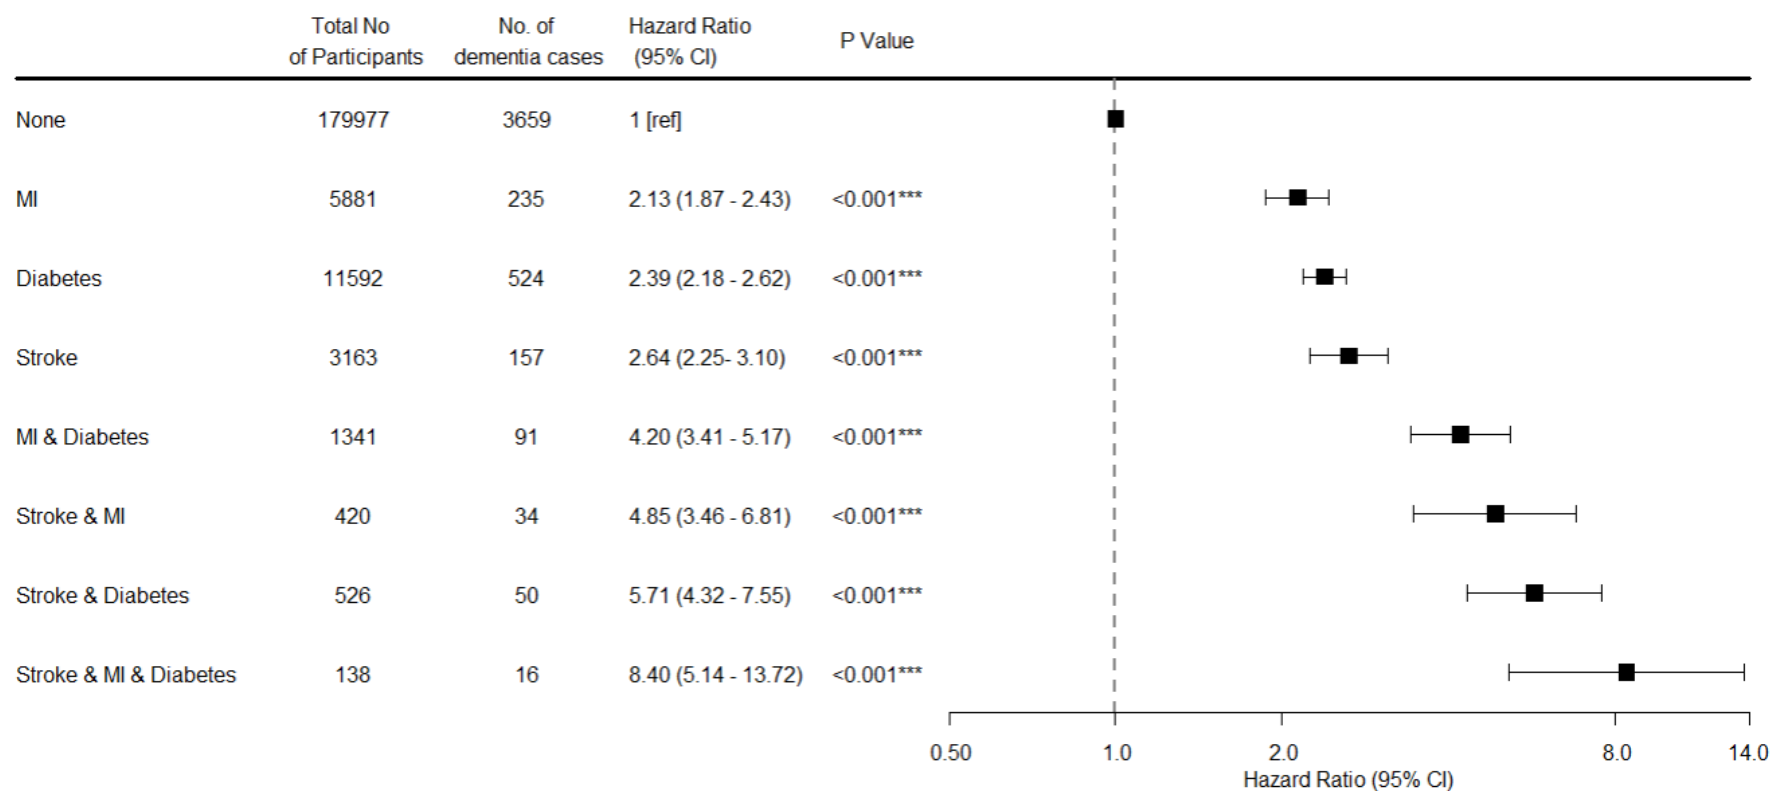

**Figure S7. Risk of incident dementia by cardiometabolic disease status at baseline (unadjusted model)**

Shown are hazard ratios for incident dementia, associated with mutually exclusive groupings of cardiometabolic conditions. The model was unadjusted.  
*Abbreviations: MI, myocardial infarction*

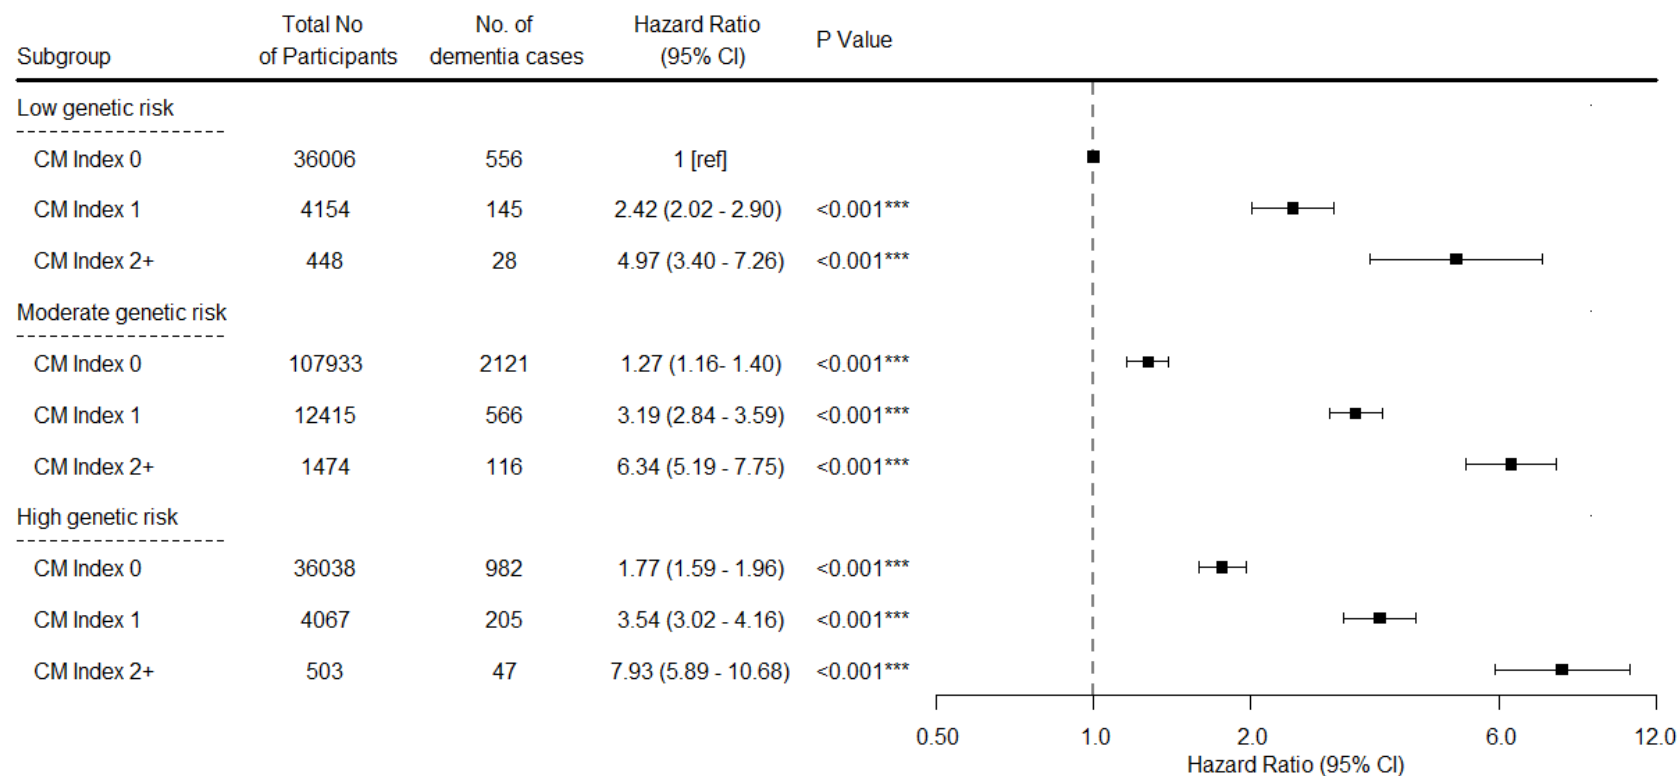

**Figure S8. Risk of incident dementia by according to cardiometabolic multimorbidity index and genetic risk (unadjusted model)**

Shown are the hazard ratios for incident dementia, according to cardiometabolic multimorbidity index and genetic risk. The reference group were participants with low genetic risk and a CM Index of zero. Horizontal bars indicate 95% confidence intervals. This model was unadjusted. *Abbreviations: CM, cardiometabolic multimorbidity*

**Table S6. Post-hoc comparisons examining the differences between individual indices of cardiometabolic multimorbidity and polygenic risk groups**

|                                  | Total Hippocampal Volume |                         | Total Grey Matter Volume |          | Total White Matter Hyperintensity Volume |                          |
|----------------------------------|--------------------------|-------------------------|--------------------------|----------|------------------------------------------|--------------------------|
|                                  | F                        | p                       | F                        | p        | F                                        | p                        |
| <b>CM Index</b>                  | 10.70                    | *< .001                 | 55.65                    | *< .001  | 4.48                                     | *0.011                   |
| <b>Polygenic Risk</b>            | 3.45                     | *0.032                  | 1.67                     | 0.189    | 0.98                                     | 0.376                    |
| <b>CM index * Polygenic Risk</b> | 1.59                     | 0.174                   | 0.87                     | 0.334    | 0.42                                     | 0.795                    |
| <b>Post-hoc analysis</b>         | <b>t</b>                 | <b>p<sub>holm</sub></b> | <b>p<sub>tukey</sub></b> | <b>t</b> | <b>p<sub>holm</sub></b>                  | <b>p<sub>tukey</sub></b> |
| <b>CM Index</b>                  |                          |                         |                          |          |                                          |                          |
| CM0 – CM1                        | 3.73                     | *< .001                 | *< .001                  | 10.54    | *< .001                                  | *< .001                  |
| CM0 – CM2+                       | 2.79                     | *0.016                  | *0.015                   | 3.093    | *0.006                                   | *0.006                   |
| CM1 – CM2+                       | 1.826                    | 0.204                   | 0.161                    | 0.517    | 0.990                                    | 0.821                    |
| <b>Polygenic risk</b>            |                          |                         |                          |          |                                          |                          |
| Low – mod                        | 2.00                     | 0.138                   | 0.113                    | 1.656    | 0.217                                    | 0.171                    |
| Low – high                       | 2.48                     | *0.039                  | *0.035                   | 0.919    | 0.705                                    | 0.461                    |
| Mod – high                       | 1.030                    | 0.909                   | 0.558                    | -0.408   | 0.990                                    | 0.971                    |

*Post-hoc analysis of relationship between individual indices of CM index and polygenic risk groups assessed with Holm–Bonferroni correction applied to account for multiple comparisons and with Tukey pairwise analysis.*

*Abbreviations: CM, cardiometabolic multimorbidity; mod, moderate*



**Table S7.** Associations between total hippocampal, total grey matter, total white matter hyperintensity volume with cardiometabolic multimorbidity index, polygenic risk and other baseline characteristics.

|                       | Total Hippocampal Volume |         | Total Grey Matter Volume |         | Total White Matter Hyperintensity Volume |         |
|-----------------------|--------------------------|---------|--------------------------|---------|------------------------------------------|---------|
|                       | $\beta$                  | p       | $\beta$                  | p       | $\beta$                                  | p       |
| <b>CM Index</b>       | -102.977                 | *< .001 | -12511.345               | *< .001 | 0.100                                    | *< .001 |
| <b>Polygenic Risk</b> | -23.069                  | *0.041  | -785.262                 | 0.131   | 0.004                                    | 0.629   |
| Sex                   | -20.202                  | 0.171   | -2356.547                | < .001  | -0.125                                   | < .001  |
| Education             |                          |         |                          |         |                                          |         |
| Upper Secondary       | -19.031                  | 0.450   | -308.849                 | 0.787   | -0.018                                   | 0.385   |
| Vocational            | -3.723                   | 0.901   | -79.918                  | 0.953   | 0.018                                    | 0.451   |
| Higher ed             | 16.744                   | 0.341   | 1175.365                 | 0.142   | -0.047                                   | < .001  |
| Socio                 |                          |         |                          |         |                                          |         |
| Quintile 2-4          | 1.011                    | 0.953   | -1071.334                | 0.171   | 0.003                                    | 0.817   |
| Quintile 5            | -35.958                  | 0.149   | -3317.742                | 0.003   | 0.044                                    | 0.031   |
| Relatedness           | 6.549                    | 0.676   | 1327.823                 | 0.062   | 0.005                                    | 0.677   |
| Allele number         | 0.003                    | 0.850   | 0.808                    | 0.208   | 0.000                                    | 0.383   |
| pc1                   | -3.304                   | 0.396   | 438.139                  | 0.013   | 0.001                                    | 0.871   |
| pc2                   | -3.580                   | 0.342   | 155.665                  | 0.363   | 0.002                                    | 0.430   |
| pc3                   | -0.446                   | 0.914   | -32.310                  | 0.864   | -0.001                                   | 0.843   |
| pc4                   | -0.365                   | 0.877   | 228.648                  | 0.032   | 0.002                                    | 0.379   |
| pc5                   | -1.294                   | 0.289   | -68.036                  | 0.220   | 0.002                                    | 0.117   |
| pc6                   | 1.306                    | 0.755   | 101.619                  | 0.593   | -0.003                                   | 0.407   |
| pc7                   | 0.726                    | 0.813   | 87.500                   | 0.531   | 0.003                                    | 0.260   |
| pc8                   | 1.607                    | 0.633   | -132.038                 | 0.387   | 0.004                                    | 0.139   |
| pc9                   | -1.498                   | 0.431   | -17.008                  | 0.844   | 0.002                                    | 0.316   |
| pc10                  | 0.782                    | 0.837   | 114.314                  | 0.507   | 0.001                                    | 0.656   |
| pc11                  | 0.280                    | 0.922   | 15.310                   | 0.906   | 0.004                                    | 0.076   |
| pc12                  | 1.237                    | 0.746   | 38.719                   | 0.823   | 0.003                                    | 0.327   |
| pc13                  | 2.990                    | 0.505   | -211.409                 | 0.299   | -0.005                                   | 0.130   |
| pc14                  | 7.602                    | 0.002   | 241.725                  | 0.026   | 0.000                                    | 0.890   |
| pc15                  | 5.194                    | 0.210   | 489.477                  | 0.009   | -0.003                                   | 0.299   |
| pc16                  | -5.251                   | 0.035   | -207.580                 | 0.067   | 0.000                                    | 0.819   |
| pc17                  | -4.732                   | 0.196   | 82.284                   | 0.620   | -0.001                                   | 0.658   |
| pc18                  | 4.776                    | 0.048   | 150.318                  | 0.170   | -0.004                                   | 0.033   |
| pc19                  | -5.994                   | 0.016   | -331.785                 | 0.003   | -0.002                                   | 0.390   |
| pc20                  | 0.957                    | 0.706   | -13.321                  | 0.908   | 0.000                                    | 0.812   |

*Note:  $\beta$  = unstandardised betas coefficients. All volume measures have been deconfounded for age and age<sup>2</sup> at imaging visit, a scaling factor for head size and imaging site. White matter hyperintensity volume was log-transformed due to a skew distribution.*

*Abbreviations: CM, cardiometabolic multimorbidity; pc, principal component*
